# Supplementary material
Source: publisher figshare collection journal article supplement (https://acs.figshare.com/ndownloader/files/4485997)
Supplement: Supplementary file 1 [file 4485997]

Supporting Information for:

Coordination and Reduction Processes in the  
Synthesis of Dendrimer-Encapsulated Pt  
Nanoparticles

*Daigo Yamamoto, Satoshi Watanabe, and Minoru T. Miyahara\**

Department of Chemical Engineering, Kyoto University, Katsura, Nishikyo, Kyoto 615-8510, Japan

miyahara@cheme.kyoto-u.ac.jp

\* Corresponding author

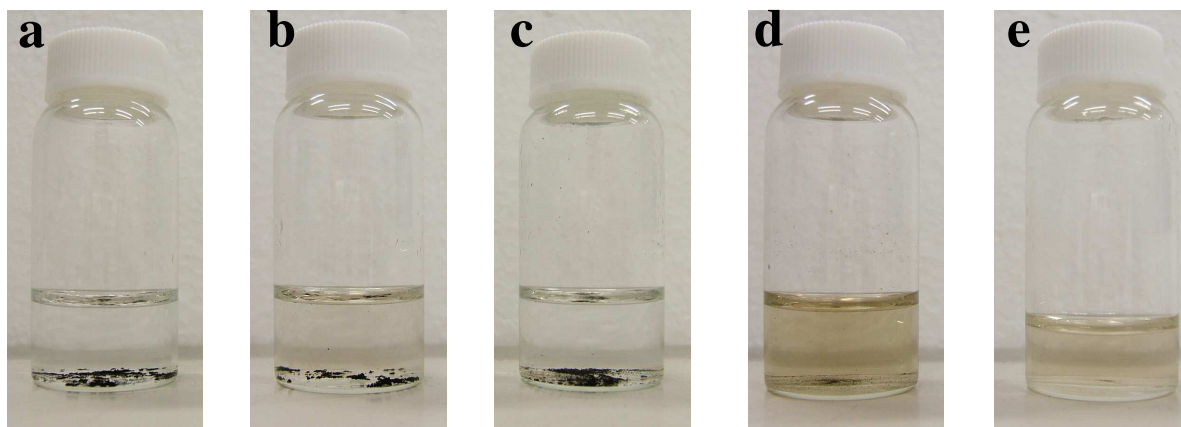

**Figure S1.** Images of suspensions in G4.5-COO<sup>-</sup> (pH 2) after NaBH<sub>4</sub> reduction for coordination times of (a) 0 h ( $\alpha = 0.0$ ), (b) 3 h ( $\alpha = 0.0$ ), (c) 2 days ( $\alpha = 0.1$ ), (d) 5 days ( $\alpha = 0.5$ ), and (e) 6 days ( $\alpha = 0.6$ ).

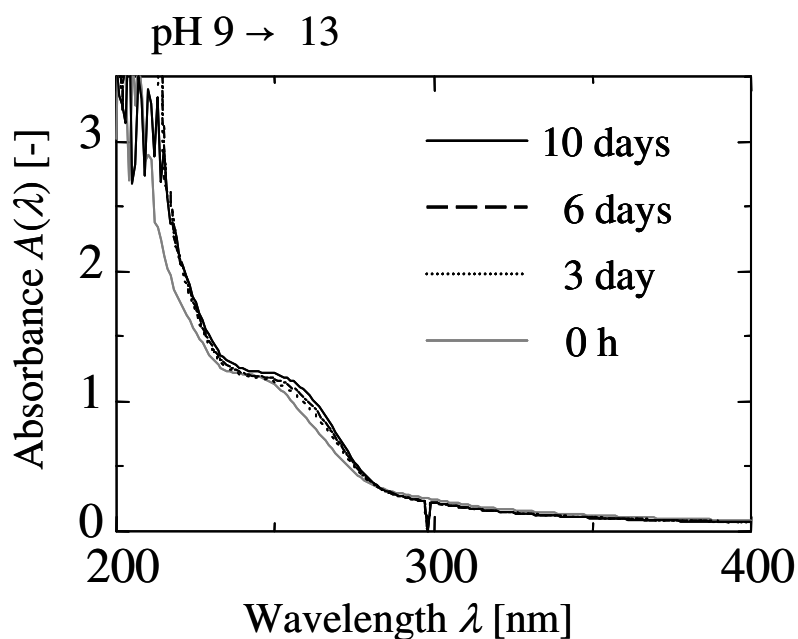

**Figure S2.** Time-dependent UV-vis spectroscopic data obtained after mixing NaOH with G4.5-COO<sup>-</sup>-Pt<sup>2+</sup> solution in which Pt<sup>2+</sup> coordination occurred at pH 9 for 10 days. The pH was shifted to pH 13 which is not ideal for the coordination. The result showed that the coordination ratio ( $\alpha = 0.4$ ) was unchanged after 10 days from the moment of the pH shift, indicating that Pt<sup>2+</sup>-tertiary amine bond is quite strong.
